# Supplementary material
Source: publisher figshare collection journal article supplement (https://gsapubs.figshare.com/ndownloader/files/23300087)
Supplement: Supplementary file 1 [file 23300087]

## Sheet: CRBP lavas
Table DR2
	WR-1-2	YC-1-1	YC-1-9	CF-1-1	CF-1-6	D-1-4	ED1-1-1	ED1-1-4	ED3-1-1	ED3-1-13		PF-1-1	PF-1-5	PV-1-2	U-1-1	U-1-13	V-2-8	W-1-1	W-1-4	GH-1-1	HR-1-1	HR-1-7		OVH-1-1	OVH-1-6	R-1-1	R-1-5	S-1-1	S-1-4	SCL-1-11	SR-1-6	T-1-1	T-1-7	AR-1-7		AR-1-8	BC-1-13	CC-1-1	CC-1-6	J-1-1	MA-1-11	R-3-1	R-3-20	BJ-1-1	BJ-1-15	M-1-1		M-1-20	MB-1-14
Unnormalized											Unnormalized												Unnormalized												Unnormalized												Unnormalized
SiO2	57.31	56.4814	53.7758	48.7023	52.5019	49.6108	51.0544	86.2993	53.118	51.8432	SiO2	49.981	51.5665	48.4018	55.121	51.9671	51.0634	52.9558	50.4129	53.119	50.2866	48.841	SiO2	49.9702	49.8635	52.0435	50.322	46.4683	49.1433	48.8602	50.166	49.9863	50.8069	50.8062	SiO2	51.3132	51.9032	52.05	51.4664	49.2755	50.0019	89.4575	51.3436	51.0651	50.7088	50.6818	SiO2	49.6941	49.1075
TiO2	1.61228	2.13961	2.04331	2.60351	2.0079	3.22815	3.22388	0.01217	1.85515	3.02749	TiO2	3.67807	3.02479	3.50397	1.83038	3.03004	3.20366	1.79938	2.89086	3.29331	3.11013	3.20174	TiO2	3.01315	3.31288	3.34389	3.75882	3.30482	3.1809	3.65707	3.66969	3.3572	2.97652	1.61546	TiO2	3.14079	1.6812	1.68469	1.67938	3.70129	3.7424	0.0378	1.21991	1.62952	3.75733	1.68979	TiO2	3.665	3.76322
Al2O3	14.497	13.7011	13.976	14.0915	13.9116	14.6193	13.7584	0.08561	14.9812	13.6567	Al2O3	15.8782	13.3836	15.0428	14.9498	13.7444	13.455	14.0839	12.5247	13.9587	13.0124	13.5294	Al2O3	13.919	13.6241	14.2391	13.161	14.7918	13.3353	12.7798	12.8003	14.0779	13.421	14.4125	Al2O3	13.3364	14.7825	14.8968	14.7488	13.0294	13.246	0.60634	18.6662	14.4483	13.113	14.9615	Al2O3	12.8169	13.262
FeO*	8.50027	10.945	11.0382	13.8687	11.7356	11.6249	12.2075	6.96112	9.12242	12.7988	FeO*	8.74715	13.0642	12.515	8.56279	12.9841	13.2276	11.544	13.9789	9.4245	13.1514	12.8876	FeO*	12.4786	12.8308	10.8151	12.5916	13.7477	13.9367	13.599	13.0947	11.6759	13.1557	9.95865	FeO*	12.6867	9.90388	9.85631	9.83657	12.5674	13.2773	0.39058	6.70148	10.6305	13.1304	10.4007	FeO*	14.1882	14.0837
MnO	0.12061	0.17971	0.15987	0.21319	0.16504	0.19551	0.18516	0.00092	0.12641	0.18275	MnO	0.12131	0.20793	0.12559	0.15819	0.21248	0.19638	0.17582	0.19616	0.18347	0.18225	0.1911	MnO	0.22345	0.17779	0.14886	0.20698	0.20618	0.2035	0.23158	0.20742	0.16546	0.2181	0.17789	MnO	0.20247	0.16888	0.15816	0.19689	0.19949	0.16254	0.00311	0.02571	0.17067	0.20982	0.19193	MnO	0.19841	0.2628
MgO	2.99274	3.15229	3.38838	3.64921	4.3183	2.54014	2.64421	0.28209	3.3171	3.02876	MgO	2.74259	3.58189	2.51788	4.37659	3.47248	3.50087	3.9234	3.81675	3.20281	3.67043	3.2042	MgO	3.13842	3.71837	3.13804	3.19933	3.7313	4.45939	3.18118	3.23635	2.42554	3.52009	5.84263	MgO	3.49011	6.63874	5.99102	6.36463	2.64015	3.07974	0.7422	1.0667	6.32612	3.85715	5.97445	MgO	3.52128	3.41969
CaO	4.82415	6.78302	6.92507	7.40768	8.2555	8.62759	7.976	0.33846	7.77621	8.19114	CaO	7.3577	8.50762	7.11434	8.77809	8.62174	8.49626	7.99954	7.52374	8.77355	8.20207	8.88315	CaO	8.43241	9.02391	8.48862	8.97974	8.32376	9.36227	8.46844	8.65152	8.59714	8.51291	10.488	CaO	8.30454	10.8272	10.7897	10.7881	8.02731	8.30709	0.65459	1.21446	10.6077	8.7939	10.9094	CaO	8.55642	8.87268
Na2O	2.09165	3.38297	3.02309	2.74796	2.8863	2.94606	2.80855	0.00741	2.96921	2.69405	Na2O	2.91658	2.87171	3.18506	2.9183	2.82995	2.72701	2.69703	2.9158	3.06818	2.87118	2.62657	Na2O	2.62774	2.66511	2.84258	2.78093	2.15156	2.5999	2.66034	2.79178	2.84673	2.83347	2.32208	Na2O	2.67871	2.49687	2.42121	2.44499	2.6013	2.65923	0.06444	0.29443	2.33963	2.5984	2.29518	Na2O	2.56507	2.6436
K2O	1.6668	1.81194	1.11005	0.50706	1.03784	0.75403	1.16494	0.04374	0.89827	1.30798	K2O	0.59678	1.39423	1.06658	1.19259	1.3491	1.37741	0.99913	1.36525	1.24154	1.13963	0.92393	K2O	0.82214	0.8215	1.33483	1.26317	0.3834	0.91831	1.07011	1.00554	0.90133	1.12966	0.52084	K2O	1.52002	0.61816	0.50322	0.54014	0.71888	1.05889	0.02036	0.16437	0.54806	1.10758	0.31085	K2O	0.97367	0.76397
P2O5	0.20331	0.38047	0.37806	0.37626	0.29165	0.64113	0.6359	0.01545	0.29034	0.5751	P2O5	0.46425	0.60588	0.84987	0.3411	0.62115	0.68965	0.33716	0.57791	0.71536	0.62767	0.67707	P2O5	0.64805	0.75183	0.77368	0.90001	0.61753	0.80223	0.80139	0.80273	0.74587	0.583	0.22233	P2O5	0.62733	0.23796	0.23573	0.23618	0.83867	0.59635	0.00706	0.04683	0.22682	0.58309	0.30835	P2O5	0.60414	0.63636
Sum	93.8188	98.9574	95.8179	94.1673	97.1116	94.7876	95.6589	94.0462	94.4543	97.3059	Sum	92.4836	98.2083	94.3228	98.2288	98.8326	97.9373	96.5152	96.203	96.9804	96.2537	94.9658	Sum	95.2732	96.7897	97.1682	97.1636	93.7264	97.9418	95.3091	96.426	94.7794	97.1573	96.3666	Sum	97.3003	99.2586	98.5868	98.3021	93.5994	96.1315	91.984	80.7437	97.9925	97.8596	97.7241	Sum	96.7832	96.8155
LOI (%)	4.65441	0.71885	3.26012	3.09854	1.73844	3.13436	3.13093	4.1929	3.29628	1.39169	LOI (%)	4.60205	0.449326	5.04525	1.63912	0.632661	0.947725	2.27863	1.56702	1.78991	1.65607	2.66405	LOI (%)	3.69686	2.7103	2.33892	1.81901	4.77	1.52634	1.94825	1.7176	3.47861	1.44408	2.49563	LOI (%)	1.57865	0.0534259	1.53068	0.719953	3.96133	2.03956	6.6691	16.1823	1.93227	1.38261	1.83412	LOI (%)	1.40845	1.42786
Ni	18.7	8.9	8.6	6.1	12.8	11	14.1	2.3	18	13.4	Ni	15.9	21.6	17.3	13	17.7	15.6	13.1	20.9	12.8	17.8	17.9	Ni	12	22	12.7	14.6	25.8	40.4	13.5	14.6	10.3	16.9	51.7	Ni	20	51.9	43.4	46.7	16.6	15.8	2.3	8.7	44.6	17.8	41.6	Ni	18.8	15.7
Cr	24	1.6	3.1	0	26.8	45	40	3.5	41.5	37.1	Cr	45.4	38.2	10.6	38.7	39.3	12.8	32.1	26	13.7	13.4	33.2	Cr	39.9	26.2	14.6	4.4	51.9	93.5	7.9	10	11	40.6	98.9	Cr	15.7	100.8	101.9	98.6	7	13	5	22.5	97.4	14	100	Cr	15.6	15.8
Sc	27.3	31	31.4	36.4	38.4	40.3	40.2	0.6	37.1	37.2	Sc	45.9	37.6	41.4	37.9	38.4	38.8	34.6	37.1	39.1	36.4	37.6	Sc	38.6	39.7	40.9	40.6	42.3	38.3	39.5	40.1	40.1	36.6	35.3	Sc	37.1	36.5	36.9	36.2	41.1	34.1	1.4	22	35.5	33.6	38.4	Sc	33	34.5
V	276	297.1	292.9	365.5	343	417.3	424.3	58.5	264.4	414.5	V	451.6	433.1	389.9	303.4	431.9	416.8	290.4	321.4	448.9	435.5	425.4	V	435.6	442	459.2	437.1	443.2	364.2	415.3	428.7	391.5	418.5	276.5	V	447.9	285	285.9	283.4	431.4	410.6	23.7	200.5	273.8	416.1	285.4	V	411.4	421.3
Ba	589.8	740.6	706.2	597.2	452.4	539.2	595.8	55.1	685	612.1	Ba	991.7	559.3	753.2	708.8	583	559.4	500.3	755.6	1153.2	614.2	634.2	Ba	501.9	487.1	781.8	615.3	428.7	580.4	576.2	954.5	561.1	571.2	247.9	Ba	568.6	273.2	238	253.4	679.7	560.2	9.4	133	236.6	594.8	241.1	Ba	567.3	583
Rb	59.3	51.5	32.6	9.6	28.8	27.1	32.4	4.4	24.4	36	Rb	18.6	37.2	11.1	29.3	36.5	33.9	34.7	52.8	41.5	26.3	32.7	Rb	30.5	22.4	40.5	32.4	10.8	36.1	28.3	29.4	25	30.6	13.8	Rb	41.7	13.4	13.2	11.9	16.4	29.6	0.1	12.8	16.8	30.1	10.5	Rb	31.2	18.5
Sr	253.6	334.7	343.7	366.1	316	366.6	348.6	21	358.5	334.6	Sr	383.5	323.9	396.3	350.9	333.3	338.1	323.5	286.1	392.1	332.3	336.2	Sr	343.8	335.3	365	316.2	332.4	310.7	318.8	333.3	379.6	334.2	241.7	Sr	322.2	242.1	245.5	240.2	327.9	255.9	14.9	82.8	261.1	256.2	253.9	Sr	250.2	258
Zr	210	199.8	201.2	205.5	161.2	210.5	211.4	1.9	168.7	200.3	Zr	191.1	198.8	217.7	169	202.1	196.5	169.9	180.1	218.4	201.7	202.9	Zr	201.4	204.6	221.3	253.2	213.4	188.9	229.6	233.3	204.5	201.2	135.8	Zr	203.8	140.5	141.2	141.4	235.9	291.3	7.3	252.6	143.6	285.1	141.8	Zr	284.1	282.3
Y	33.9	39.3	38.2	38.6	35.5	56.1	45.9	1.6	42.3	46.2	Y	43.7	42.6	48.1	37.6	44.1	44.2	42.4	42.6	59.6	43.9	48	Y	44.4	46.5	53.4	57.5	45.6	45.9	51.9	53.2	47.4	44.2	29.7	Y	50.1	31.5	29.6	30.9	65.8	55.4	4.2	60.9	29.9	54.6	35.6	Y	55.3	60.7
Nb	14.1	14.3	13.8	13.9	11.6	15.3	15.9	0.9	12.4	15.4	Nb	14.6	15.7	17.3	11.2	15.3	15	11.4	13.6	16.3	15.4	16.1	Nb	15.4	16.7	16.5	20.4	16.5	15.2	17.5	18.3	15.3	15.1	11.7	Nb	16	12	12.2	12.1	18.5	27.5	0.9	16.2	12.2	26.8	12	Nb	26.5	25.7
Ga	18.1	21.3	22.2	23	21.6	23.2	22.9	1	21.8	22.1	Ga	24.4	20.7	23.5	21.9	22	21.4	20.9	20	22.4	22.8	20.8	Ga	19.8	19.9	24.1	23.7	22.7	21.4	21.9	22.8	23.2	20.4	17	Ga	21.9	19.6	19	18.9	22.1	23.1	1.9	23	18.6	24.4	17.7	Ga	23.2	24.7
Cu	29.6	13.6	12.6	12.9	35.3	26.4	26.7	6.5	23	29.3	Cu	37.5	30.2	23.3	20	28.6	26.2	25.5	31.3	24.4	21.9	32.2	Cu	26	33.9	20.8	24.3	30	41	20.8	21.8	18.4	26.7	49.1	Cu	26	53.4	39.7	49.1	19.7	20.5	8.1	27.4	52	21.5	42.2	Cu	22.7	18.5
Zn	117.2	132.8	135.5	145.3	116.7	157.5	147.9	13	197	151.5	Zn	293	142.4	171.5	119.9	146.7	152.1	112.3	142.1	177.6	152.6	149.6	Zn	151.6	146.2	170.1	170.3	157.6	138.1	162	170.3	159.9	147.7	93	Zn	163.1	99.4	91.7	97.2	164	164.8	1.1	103.9	95	178.5	102.3	Zn	156.5	152.1
Pb	11.3	9.2	8.1	7.4	4	6.5	7.3	1.2	7.7	6.5	Pb	6.4	5.5	6.7	7.9	5.4	5.7	6.5	6.1	7.5	6.5	6.5	Pb	6.8	5.9	6.4	7.5	6.7	4.6	5.3	6.2	6.2	5.6	5.1	Pb	6.9	4.3	4.3	3.9	7.1	8.6	2.6	14.8	5.4	7.9	3.2	Pb	7.6	5.9
La	25.5	26.4	26.5	26.4	20.6	35	24.7	0	27	27.6	La	29.6	24.8	28.3	22.1	29.9	23.6	27.3	26.1	32.5	26.2	30.4	La	30.8	30.4	35.4	32.1	24.3	26.3	31	32.5	27.3	27.1	15.9	La	28.6	19.4	18.7	17.7	33.2	41	3.4	45	18.8	36.3	16	La	40.5	38.9
Ce	53.6	61.1	60.6	53.5	35.1	60.3	56.6	2	48.7	56.9	Ce	55.1	54.8	65.3	53.5	57	59.9	51.5	58.1	71.7	58.5	61.3	Ce	59.3	63.5	66.3	77.5	59.4	62.7	65.2	72.5	63.7	52.7	33.4	Ce	64.3	37	36.2	40.8	66.9	79.9	0.3	92.9	40.2	82.1	39.8	Ce	78.5	79.9
Th	6.6	6.8	5.8	4.7	2.7	4.7	3.4	0	3.9	3.1	Th	3.5	4.6	3.9	4.2	3.7	3.6	2.9	3.4	4.4	3.4	3.5	Th	4.1	3.3	3.8	3.4	2.5	2.1	2.4	3	4.3	4.5	2.5	Th	3.5	3	1.4	2.1	3.7	5.4	0.8	5.9	2	5.2	2.1	Th	5.9	5.3
Nd	26.8	30.8	31.2	29.2	22.6	37.4	35.1	0.9	28.8	35.5	Nd	33.3	31.5	36	28.3	32	34.8	29.5	32.7	40.3	33.6	34.6	Nd	32.7	36.7	40.9	46.3	32.1	38	40.7	41.2	35.8	33.3	20.5	Nd	37.9	20.9	21.8	21.5	41.4	44.3	1.7	57.7	21.9	43	23.7	Nd	40.6	42.2
U	3.1	2.5	3.9	0.5	0.6	1.4	2.6	1.3	2.3	1.9	U	2.8	4.3	2	0.8	3.6	1.3	1.7	1.4	3.6	1.2	1.9	U	1.9	1.4	2.7	2.2	0	1.5	0.1	1.9	2.1	1.1	0.5	U	1.5	0.6	0.9	1.6	3.4	2.1	0	3.3	0.7	1.4	0	U	3.3	3.2
Cs	3.1	0.8	0.1	0	2.1	1.4	0	2.3	2.9	1.4	Cs	0	0	3.8	0	3.8	0	2.2	4.5	0	0	1	Cs	0.3	0	1.9	2.5	1.9	0	0	1.1	1.9	2	0	Cs	2.6	0	0	0	0	0	0	1.3	2.3	5.6	1.5	Cs	2.2	0
As >/=	7.1	0	0	0	3.1	7.4	0	8.1	0	0	As >/=	8.5	0	0	0	0	0.3	2.6	3.1	0	0	0	As >/=	0.3	0	0	0	3.1	3.6	0	1.6	0	0	0	As >/=	0	0	0	0	0	0	0	0	0	0	0.2	As >/=	4.6	3.8
sum tr.	1808.7	2024.1	1978.2	1941.8	1690.9	2089.6	2095.8	186.1	2015.4	2082.6	sum tr.	2696.1	2026.8	2267.2	1978.4	2074.3	2000	1735.3	2065	2780	2063.6	2126	sum tr.	1997.1	1983.7	2378.3	2181.5	1950.9	2052.9	2047.9	2490.3	2028.6	2030.2	1380	sum tr.	2079.4	1444.5	1381.5	1407.6	2201.8	2083.1	89.1	1187.2	1408.4	2135	1409	sum tr.	2079	2090
in %	0.18087	0.20241	0.19782	0.19418	0.16909	0.20896	0.20958	0.01861	0.20154	0.20826	in %	0.26961	0.20268	0.22672	0.19784	0.20743	0.2	0.17353	0.2065	0.278	0.20636	0.2126	in %	0.19971	0.19837	0.23783	0.21815	0.19509	0.20529	0.20479	0.24903	0.20286	0.20302	0.138	in %	0.20794	0.14445	0.13815	0.14076	0.22018	0.20831	0.00891	0.11872	0.14084	0.2135	0.1409	in %	0.2079	0.209
sum m+tr	93.9997	99.1598	96.0157	94.3615	97.2807	94.9966	95.8685	94.0648	94.6558	97.5142	sum m+tr	92.7532	98.411	94.5496	98.4266	99.04	98.1373	96.6887	96.4095	97.2584	96.4601	95.1784	sum m+tr	95.4729	96.9881	97.4061	97.3817	93.9215	98.1471	95.5139	96.6751	94.9823	97.3603	96.5046	sum m+tr	97.5082	99.4031	98.7249	98.4428	93.8195	96.3398	91.9929	80.8624	98.1333	98.0731	97.865	sum m+tr	96.9911	97.0245
M+Toxides	94.0438	99.1093	96.1084	94.4105	97.3253	95.0521	95.8592	94.2546	94.6647	97.5681	M+Toxides	92.8188	98.4647	94.5719	98.2288	99.0396	98.1895	96.7324	96.4587	97.196	96.4666	95.2094	M+Toxides	95.5267	97.0419	97.4656	97.4386	93.9764	98.2011	95.5675	96.7349	95.0345	97.4137	96.5984	M+Toxides	97.5214	99.4799	98.7655	98.5313	93.8286	96.3444	92.2	80.9588	98.1739	98.1294	97.9061	M+Toxides	97.0464	97.0803
w/LOI	98.6982	99.8282	99.3685	97.509	99.0637	98.1865	98.9902	98.4475	97.961	98.9598	w/LOI	97.4208	98.914	99.6171	99.8679	99.6723	99.1372	99.011	98.0257	98.9859	98.1226	97.8735	w/LOI	99.2236	99.7522	99.8045	99.2576	98.7464	99.7274	97.5157	98.4525	98.5131	98.8578	99.0941	w/LOI	99.1001	99.5334	100.296	99.2512	97.7899	98.3839	98.8691	97.141	100.106	99.512	99.7403	w/LOI	98.4549	98.5082
if Fe3+	99.6417	101.043	100.594	99.0484	100.366	99.4769	100.345	99.2202	98.9736	100.38	if Fe3+	98.3917	100.364	101.006	100.818	101.113	100.605	100.292	99.5774	100.032	99.5824	99.304	if Fe3+	100.609	101.176	101.005	100.655	100.272	101.274	99.0252	99.906	99.8091	100.318	100.199	if Fe3+	100.508	100.633	101.39	100.343	99.1849	99.8577	98.9125	97.8849	101.286	100.97	100.895	if Fe3+	100.03	100.071
[truncated: 14 more columns]

## Sheet: Ashes
%	AR-1-4b	AR-1-6	AR-1-6a	BJ-1-10	MA-1-6t	PRD-1-3	WJ-1-1	SRD-1-2	%	U-1-2	J-1-4	J-1-5b	MA-1-4b	MA-1-5m	PRD-1-4	MB-1-13	SRD-1-1t
P2O5	0.0398339	0.0451239	0.0440694	0.0154249	0.0470199	0.043598	0.0137224	0.0199208	P2O5	0.0782246	0.0533316	0.0629861	0.0410236	0.042196	0.0487963	0.0193551	0.0312119
MnO	0.048738	0.0338931	0.0388073	0.0404971	0.0637195	0.0334336	0.00720481	0.0916681	MnO	0.0330541	0.0394835	0.0395078	0.0377337	0.0375737	0.0357945	0.0337964	0.0290888
TiO2	0.416727	0.359765	0.392448	0.231363	0.57056	0.344332	0.145524	0.250752	TiO2	0.749819	0.506311	0.465994	0.395065	0.398405	0.370431	0.828751	0.993783
MgO	0.948426	0.138171	1.32926	0.157278	2.17103	0.154126	0.62553	0.549542	MgO	1.30725	0.978619	1.41458	1.31048	0.365995	0.167129	1.32084	1.87964
CaO	1.12081	0.844379	0.914187	0.743242	1.91831	0.849868	0.372889	0.927841	CaO	1.02799	1.11671	1.08992	1.48881	1.20889	0.896105	1.55492	1.74673
Na2O	1.57168	2.39236	1.66391	2.15508	1.22333	2.5905	0.138996	1.67193	Na2O	1.70247	1.37293	1.34637	1.33374	1.40383	2.70411	1.58752	0.69812
FeO*	3.47708	2.1572	2.87279	2.09542	3.48658	2.0631	1.36557	2.27724	FeO*	3.3068	2.96948	2.63492	2.28811	2.22709	2.21561	3.41796	7.52196
K2O	5.40861	6.37675	5.83659	6.03577	3.04608	5.99204	0.363301	5.73298	K2O	2.79977	4.50661	4.49067	5.3246	5.94456	5.86245	1.65997	1.15736
Al2O3	12.5243	12.0782	12.9016	12.1035	17.3533	12.0465	3.03245	12.7718	Al2O3	14.6683	14.0624	13.5245	12.8579	12.5557	12.1514	9.96231	16.8417
SiO2	74.4438	75.5742	74.0063	76.4224	70.12	75.8825	93.9348	75.7063	SiO2	74.3263	74.3941	74.9306	74.9225	75.8157	75.5482	79.6146	69.1004
Total	100	100	100	100	100	100	100	100	Total	100	100	100	100	100	100	100	100
ppm									ppm
NiO	1.52703	2.03604	10.9437	2.16329	12.4708	3.69033	2.6723	9.16219	NiO	25.9595	4.96285	4.45384	2.4178	3.43582	2.6723	7.76241	23.5417
Cr2O3	2.48468	5.70014	8.03866	5.40782	12.7157	5.70014	13.1542	1.31542	Cr2O3	71.9094	13.4465	13.1542	4.53088	7.01556	5.11551	27.9161	77.1711
Sc2O3	8.58959	8.58959	7.97605	4.44818	11.3505	7.05573	5.52188	5.67526	Sc2O3	15.0318	10.1234	9.66329	7.51589	7.97605	6.28881	7.97605	22.8544
V2O3	79.1465	12.9459	76.9398	9.41519	83.2656	10.0036	53.2547	22.9495	V2O3	107.686	43.9866	48.9884	28.2456	20.5957	10.1508	78.9994	249.797
BaO	956.951	1036.45	817.947	646.341	743.477	972.471	296.877	693.793	BaO	822.19	938.753	986.65	855.797	1048.17	1046.83	630.264	337.406
Rb2O	187.443	225.391	186.678	223.751	120.077	230.093	24.0592	208.44	Rb2O	131.123	205.159	204.503	203.956	237.421	225.063	42.7598	52.2741
SrO	63.979	59.0121	57.3564	32.6399	143.095	57.7112	28.8556	41.8643	SrO	271.645	119.68	121.927	79.9442	70.7199	61.4955	224.222	136.236
ZrO2	597.054	578.818	595.163	502.092	753.206	560.582	40.3889	524.921	ZrO2	486.558	524.111	510.197	591.11	576.251	597.459	362.825	262.46
Y2O3	56.2588	69.4663	64.5135	97.2783	71.3713	72.5142	7.61971	93.9764	Y2O3	35.6856	67.5614	74.8001	67.8154	69.2123	71.2443	20.0652	25.907
Nb2O5	50.3551	58.08	58.08	60.3689	67.0925	60.2258	5.57912	60.512	Nb2O5	29.4692	53.9315	50.3551	58.9384	55.5051	58.3661	29.8983	21.172
Ga2O3	21.911	22.9864	24.8683	28.0945	28.3633	23.7929	6.58675	27.4224	Ga2O3	24.8683	25.9437	24.7339	23.3897	25.5404	23.1208	14.6522	25.2716
CuO	9.63875	4.25607	8.38697	6.25893	13.7696	5.00714	5.00714	9.63875	CuO	22.5321	13.0186	11.6416	4.38125	5.88339	3.25464	29.0414	35.05
ZnO	63.2505	58.9921	63.2505	98.1949	77.0279	57.9901	18.5368	96.3161	ZnO	119.362	75.5249	74.6481	60.1193	60.8708	60.6203	23.2962	99.8231
PbO	27.3615	32.5322	30.27	34.0403	42.0117	32.7476	4.09345	34.5789	PbO	17.5587	28.7619	29.8391	32.209	31.1318	32.1013	18.636	16.4815
La2O3	76.113	87.6062	91.4764	108.833	92.0627	89.8345	9.38219	106.605	La2O3	50.4293	84.3224	88.1926	86.668	89.8345	89.4826	30.1403	30.7267
CeO2	160.418	180.946	187.092	227.658	235.894	183.405	10.3257	232.206	CeO2	91.5793	173.816	184.511	183.896	183.282	179.102	55.6852	59.25
ThO2	32.7719	36.0822	36.1925	39.9442	42.7028	37.627	1.65515	40.6063	ThO2	13.3515	32.1099	32.2202	36.9649	35.1995	36.3029	8.71711	9.93088
Nd2O3	55.4035	63.9181	65.4344	83.2802	66.9507	68.7003	7.81481	78.498	Nd2O3	38.6075	63.8015	69.8667	63.6849	66.6008	64.3847	18.6622	25.8938
U2O3	7.15538	9.68728	6.82513	11.1184	4.40331	9.79737	0.440331	8.47637	U2O3	3.96298	7.15538	7.92596	7.59571	9.35703	8.69654	0.990745	1.98149
Cs2O	2.12039	5.40699	2.65048	1.80233	7.42135	7.84543	0	1.27223	Cs2O	3.8167	8.05747	5.51301	3.92272	3.39262	2.33243	1.59029	5.72504
As2O5	5.06183	5.98217	20.2473	0	0	0	0	0	As2O5	0	0	0	0	3.22117	3.06778	3.37455	0
W2O3	0	0	0	0	0	0	0	0	W2O3	0	0	0	0	0	0	0	0
sum tr.	2464.99	2564.88	2420.33	2223.13	2628.73	2496.79	541.825	2298.23	sum tr.	2383.33	2494.23	2553.78	2403.1	2610.62	2587.15	1637.47	1518.95
in %	0.246499	0.256488	0.242033	0.222313	0.262873	0.249679	0.0541825	0.229823	in %	0.238333	0.249423	0.255378	0.24031	0.261062	0.258715	0.163747	0.151895

## Sheet: Cascades
CITATION	SIO2(WT%)	Y(PPM)	ZR(PPM)	NB(PPM)
[3796] SMITH D. R. (1987)	66.48	11	122	6.9
[3796] SMITH D. R. (1987)	63.32	11.7	124	7
[3796] SMITH D. R. (1987)	64.18	13	135	9.3
[3796] SMITH D. R. (1987)	69.02	14.4	167	8.5
[3796] SMITH D. R. (1987)	65.32	13.5	142	7.5
[3796] SMITH D. R. (1987)	64.56	10	137	6.7
[3796] SMITH D. R. (1987)	64.74	9.6	135	8.7
[3796] SMITH D. R. (1987)	63.88	9.8	177	9.8
[3796] SMITH D. R. (1987)	64.52	14	148	10
[3755] LEEMAN W. P.(1990) [GeoRem752]	69.08	14.4	167	8.5
[5647] STOCKSTILL K. R. (2002)	61.9	17	173	11
[5647] STOCKSTILL K. R. (2002)	60.7	17	160	11
[5647] STOCKSTILL K. R. (2002)	59.6	17	168	11
[5647] STOCKSTILL K. R. (2002)	64.3	16	182	11
[5647] STOCKSTILL K. R. (2002)	60.8	16	177	11
[5647] STOCKSTILL K. R. (2002)	59.9	17	173	11
[5647] STOCKSTILL K. R. (2002)	61.7	17	176	12
[5647] STOCKSTILL K. R. (2002)	61.3	17	180	11
[5647] STOCKSTILL K. R. (2002)	61.5	16	179	11
[5647] STOCKSTILL K. R. (2002)	60.8	17	175	12
[5647] STOCKSTILL K. R. (2002)	61.6	19	172	11
[5647] STOCKSTILL K. R. (2002)	59.7	18	168	11
[5647] STOCKSTILL K. R. (2002)	61.9	15	178	12
[5647] STOCKSTILL K. R. (2002)	62.9	16	192	13
[5647] STOCKSTILL K. R. (2002)	59.5	19	192	13
[5647] STOCKSTILL K. R. (2002)	60.9	18	186	12
[5647] STOCKSTILL K. R. (2002)	59.1	18	204	13
[5647] STOCKSTILL K. R. (2002)	61	17	197	13
[5647] STOCKSTILL K. R. (2002)	60.9	17	193	13
[5647] STOCKSTILL K. R. (2002)	61	17	199	12
[5647] STOCKSTILL K. R. (2002)	54.1	16	118	10
[5647] STOCKSTILL K. R. (2002)	55.7	17	145	14
[5647] STOCKSTILL K. R. (2002)	53.5	16	123	10
[5647] STOCKSTILL K. R. (2002)	56.3	13	129	10
[5647] STOCKSTILL K. R. (2002)	54.3	16	119	10
[5647] STOCKSTILL K. R. (2002)	54.4	16	119	10
[15004] BAGGERMAN T. D. (2011)	55.7775	27.4812	182.388	7.65434
[15004] BAGGERMAN T. D. (2011)	55.6561	28.8694	192.245	7.90795
[15004] BAGGERMAN T. D. (2011)	55.7024	28.1396	190.325	7.74116
[15004] BAGGERMAN T. D. (2011)	55.2117	27.7344	188.604	7.92244
[15004] BAGGERMAN T. D. (2011)	55.7731	29.1073	194.946	7.8186
[15004] BAGGERMAN T. D. (2011)	53.4662	30.389	189.522	7.04105
[15004] BAGGERMAN T. D. (2011)	52.6015	30.9544	190.794	6.98725
[15004] BAGGERMAN T. D. (2011)	52.5207	31.1028	194.011	7.15903
[15004] BAGGERMAN T. D. (2011)	58.7026	18.8169	146.395	5.39104
[15004] BAGGERMAN T. D. (2011)	58.743	17.9362	138.962	5.05681
[15004] BAGGERMAN T. D. (2011)	58.3441	18.7455	147.686	5.45528
[15004] BAGGERMAN T. D. (2011)	58.5071	17.8853	140.384	5.22334
[15004] BAGGERMAN T. D. (2011)	58.7184	17.6572	137.043	5.01736
[15004] BAGGERMAN T. D. (2011)	61.7976	20.1283	159.619	7.7808
[15004] BAGGERMAN T. D. (2011)	64.2207	22.9582	200.988	8.51847
[15004] BAGGERMAN T. D. (2011)	60.183	21.8403	159.701	6.04055
[15004] BAGGERMAN T. D. (2011)	63.6273	22.8939	179.581	7.95394
[15004] BAGGERMAN T. D. (2011)	61.6556	25.0032	171.802	7.34467

## Sheet: Yellowstone
CITATION	LOCATION	SIO2(WT%)	Y(PPM)	ZR(PPM)	NB(PPM)
[3421] HILDRETH W. (1991)	YELLOWSTONE-SNAKE RIVER PLAIN VOLCANIC PROVINCE / YELLOWSTONE PLATEAU / YELLOWSTONE PLATEAU VOLCANIC FIELD	75.7	76	233	56
[3421] HILDRETH W. (1991)	YELLOWSTONE-SNAKE RIVER PLAIN VOLCANIC PROVINCE / YELLOWSTONE PLATEAU / YELLOWSTONE PLATEAU VOLCANIC FIELD	70.8	69	638	53
[3421] HILDRETH W. (1991)	YELLOWSTONE-SNAKE RIVER PLAIN VOLCANIC PROVINCE / YELLOWSTONE PLATEAU / YELLOWSTONE PLATEAU VOLCANIC FIELD	77.1	31	382	29
[3421] HILDRETH W. (1991)	YELLOWSTONE-SNAKE RIVER PLAIN VOLCANIC PROVINCE / YELLOWSTONE PLATEAU / YELLOWSTONE PLATEAU VOLCANIC FIELD	74.7	38	380	47
[3421] HILDRETH W. (1991)	YELLOWSTONE-SNAKE RIVER PLAIN VOLCANIC PROVINCE / YELLOWSTONE PLATEAU / YELLOWSTONE PLATEAU VOLCANIC FIELD	74.7	53	320	54
[3421] HILDRETH W. (1991)	YELLOWSTONE-SNAKE RIVER PLAIN VOLCANIC PROVINCE / YELLOWSTONE PLATEAU / YELLOWSTONE PLATEAU VOLCANIC FIELD	76.1	60	284	47
[3421] HILDRETH W. (1991)	YELLOWSTONE-SNAKE RIVER PLAIN VOLCANIC PROVINCE / YELLOWSTONE PLATEAU / YELLOWSTONE PLATEAU VOLCANIC FIELD	77.1	55	278	66
[3421] HILDRETH W. (1991)	YELLOWSTONE-SNAKE RIVER PLAIN VOLCANIC PROVINCE / YELLOWSTONE PLATEAU / YELLOWSTONE PLATEAU VOLCANIC FIELD	76.7	84	167	56
[3421] HILDRETH W. (1991)	YELLOWSTONE-SNAKE RIVER PLAIN VOLCANIC PROVINCE / YELLOWSTONE PLATEAU / YELLOWSTONE PLATEAU VOLCANIC FIELD	76.1	21	280	44
[3421] HILDRETH W. (1991)	YELLOWSTONE-SNAKE RIVER PLAIN VOLCANIC PROVINCE / YELLOWSTONE PLATEAU / YELLOWSTONE PLATEAU VOLCANIC FIELD	77	22	171	78
[3421] HILDRETH W. (1991)	YELLOWSTONE-SNAKE RIVER PLAIN VOLCANIC PROVINCE / YELLOWSTONE PLATEAU / YELLOWSTONE PLATEAU VOLCANIC FIELD	77	59	237	53
[3421] HILDRETH W. (1991)	YELLOWSTONE-SNAKE RIVER PLAIN VOLCANIC PROVINCE / YELLOWSTONE PLATEAU / YELLOWSTONE PLATEAU VOLCANIC FIELD	76.8	47	278	69
[4278] BINDEMAN I. N. (2001)	YELLOWSTONE-SNAKE RIVER PLAIN VOLCANIC PROVINCE / YELLOWSTONE PLATEAU / YELLOWSTONE PLATEAU VOLCANIC FIELD	77.6	45	202	60
[4278] BINDEMAN I. N. (2001)	YELLOWSTONE-SNAKE RIVER PLAIN VOLCANIC PROVINCE / YELLOWSTONE PLATEAU / YELLOWSTONE PLATEAU VOLCANIC FIELD	77.1	65	189	102
[4278] BINDEMAN I. N. (2001)	YELLOWSTONE-SNAKE RIVER PLAIN VOLCANIC PROVINCE / YELLOWSTONE PLATEAU / YELLOWSTONE PLATEAU VOLCANIC FIELD	75.3	56	315	51
[4278] BINDEMAN I. N. (2001)	YELLOWSTONE-SNAKE RIVER PLAIN VOLCANIC PROVINCE / YELLOWSTONE PLATEAU / YELLOWSTONE PLATEAU VOLCANIC FIELD	74.9	44	248	48
[4278] BINDEMAN I. N. (2001)	YELLOWSTONE-SNAKE RIVER PLAIN VOLCANIC PROVINCE / YELLOWSTONE PLATEAU / YELLOWSTONE PLATEAU VOLCANIC FIELD	77.4	46	204	47
[4278] BINDEMAN I. N. (2001)	YELLOWSTONE-SNAKE RIVER PLAIN VOLCANIC PROVINCE / YELLOWSTONE PLATEAU / YELLOWSTONE PLATEAU VOLCANIC FIELD	75.7	55	393	73
[4278] BINDEMAN I. N. (2001)	YELLOWSTONE-SNAKE RIVER PLAIN VOLCANIC PROVINCE / YELLOWSTONE PLATEAU / YELLOWSTONE PLATEAU VOLCANIC FIELD	72.7	49	211	42
[4278] BINDEMAN I. N. (2001)	YELLOWSTONE-SNAKE RIVER PLAIN VOLCANIC PROVINCE / YELLOWSTONE PLATEAU / YELLOWSTONE PLATEAU VOLCANIC FIELD	76.2	33	225	40
[4278] BINDEMAN I. N. (2001)	YELLOWSTONE-SNAKE RIVER PLAIN VOLCANIC PROVINCE / YELLOWSTONE PLATEAU / YELLOWSTONE PLATEAU VOLCANIC FIELD	77.1	19	316	49
[4278] BINDEMAN I. N. (2001)	YELLOWSTONE-SNAKE RIVER PLAIN VOLCANIC PROVINCE / YELLOWSTONE PLATEAU / YELLOWSTONE PLATEAU VOLCANIC FIELD	74.8	39	312	51
[4278] BINDEMAN I. N. (2001)	YELLOWSTONE-SNAKE RIVER PLAIN VOLCANIC PROVINCE / YELLOWSTONE PLATEAU / YELLOWSTONE PLATEAU VOLCANIC FIELD	79	64	296	50
[4278] BINDEMAN I. N. (2001)	YELLOWSTONE-SNAKE RIVER PLAIN VOLCANIC PROVINCE / YELLOWSTONE PLATEAU / YELLOWSTONE PLATEAU VOLCANIC FIELD	76.8	76	300	60
[4278] BINDEMAN I. N. (2001)	YELLOWSTONE-SNAKE RIVER PLAIN VOLCANIC PROVINCE / YELLOWSTONE PLATEAU / YELLOWSTONE PLATEAU VOLCANIC FIELD	76.8	43	266	58
[4278] BINDEMAN I. N. (2001)	YELLOWSTONE-SNAKE RIVER PLAIN VOLCANIC PROVINCE / YELLOWSTONE PLATEAU / YELLOWSTONE PLATEAU VOLCANIC FIELD	75	75	549	63
[4278] BINDEMAN I. N. (2001)	YELLOWSTONE-SNAKE RIVER PLAIN VOLCANIC PROVINCE / YELLOWSTONE PLATEAU / YELLOWSTONE PLATEAU VOLCANIC FIELD	75.9	52	264	53
[4278] BINDEMAN I. N. (2001)	YELLOWSTONE-SNAKE RIVER PLAIN VOLCANIC PROVINCE / YELLOWSTONE PLATEAU / YELLOWSTONE PLATEAU VOLCANIC FIELD	73.8	43	365	62
[4278] BINDEMAN I. N. (2001)	YELLOWSTONE-SNAKE RIVER PLAIN VOLCANIC PROVINCE / YELLOWSTONE PLATEAU / YELLOWSTONE PLATEAU VOLCANIC FIELD	78.1	68	185	49
[4278] BINDEMAN I. N. (2001)	YELLOWSTONE-SNAKE RIVER PLAIN VOLCANIC PROVINCE / YELLOWSTONE PLATEAU / YELLOWSTONE PLATEAU VOLCANIC FIELD	76.6	68	312	56
[4278] BINDEMAN I. N. (2001)	YELLOWSTONE-SNAKE RIVER PLAIN VOLCANIC PROVINCE / YELLOWSTONE PLATEAU / YELLOWSTONE PLATEAU VOLCANIC FIELD	77.4	52	194	64
[4278] BINDEMAN I. N. (2001)	YELLOWSTONE-SNAKE RIVER PLAIN VOLCANIC PROVINCE / YELLOWSTONE PLATEAU / YELLOWSTONE PLATEAU VOLCANIC FIELD	75.3	47	379	53
[4278] BINDEMAN I. N. (2001)	YELLOWSTONE-SNAKE RIVER PLAIN VOLCANIC PROVINCE / YELLOWSTONE PLATEAU / YELLOWSTONE PLATEAU VOLCANIC FIELD	76.2	41	325	55
[4278] BINDEMAN I. N. (2001)	YELLOWSTONE-SNAKE RIVER PLAIN VOLCANIC PROVINCE / YELLOWSTONE PLATEAU / YELLOWSTONE PLATEAU VOLCANIC FIELD	76.8	48	153	80
[4278] BINDEMAN I. N. (2001)	YELLOWSTONE-SNAKE RIVER PLAIN VOLCANIC PROVINCE / YELLOWSTONE PLATEAU / YELLOWSTONE PLATEAU VOLCANIC FIELD	77.6	42	168	40
[4278] BINDEMAN I. N. (2001)	YELLOWSTONE-SNAKE RIVER PLAIN VOLCANIC PROVINCE / YELLOWSTONE PLATEAU / YELLOWSTONE PLATEAU VOLCANIC FIELD	76.9	55	270	75
[4278] BINDEMAN I. N. (2001)	YELLOWSTONE-SNAKE RIVER PLAIN VOLCANIC PROVINCE / YELLOWSTONE PLATEAU / YELLOWSTONE PLATEAU VOLCANIC FIELD	75.5	48	394	41
[4278] BINDEMAN I. N. (2001)	YELLOWSTONE-SNAKE RIVER PLAIN VOLCANIC PROVINCE / YELLOWSTONE PLATEAU / YELLOWSTONE PLATEAU VOLCANIC FIELD	74.8	74	388	44
[4278] BINDEMAN I. N. (2001)	YELLOWSTONE-SNAKE RIVER PLAIN VOLCANIC PROVINCE / YELLOWSTONE PLATEAU / YELLOWSTONE PLATEAU VOLCANIC FIELD	75.6	54	445	28
[4278] BINDEMAN I. N. (2001)	YELLOWSTONE-SNAKE RIVER PLAIN VOLCANIC PROVINCE / YELLOWSTONE PLATEAU / YELLOWSTONE PLATEAU VOLCANIC FIELD	73.6	69	399	42
[4278] BINDEMAN I. N. (2001)	YELLOWSTONE-SNAKE RIVER PLAIN VOLCANIC PROVINCE / YELLOWSTONE PLATEAU / YELLOWSTONE PLATEAU VOLCANIC FIELD	77.3	70	328	53
[4278] BINDEMAN I. N. (2001)	YELLOWSTONE-SNAKE RIVER PLAIN VOLCANIC PROVINCE / YELLOWSTONE PLATEAU / YELLOWSTONE PLATEAU VOLCANIC FIELD	75.2	65	285	42
[13898] GIRARD G. (2009)	YELLOWSTONE-SNAKE RIVER PLAIN VOLCANIC PROVINCE / YELLOWSTONE PLATEAU / YELLOWSTONE PLATEAU VOLCANIC FIELD	70.12	62.5	413	41.3
[13898] GIRARD G. (2009)	YELLOWSTONE-SNAKE RIVER PLAIN VOLCANIC PROVINCE / YELLOWSTONE PLATEAU / YELLOWSTONE PLATEAU VOLCANIC FIELD	69.63	60.2	415	41.2
[13898] GIRARD G. (2009)	YELLOWSTONE-SNAKE RIVER PLAIN VOLCANIC PROVINCE / YELLOWSTONE PLATEAU / YELLOWSTONE PLATEAU VOLCANIC FIELD	70.13	60	426	41.6
[13898] GIRARD G. (2009)	YELLOWSTONE-SNAKE RIVER PLAIN VOLCANIC PROVINCE / YELLOWSTONE PLATEAU / YELLOWSTONE PLATEAU VOLCANIC FIELD	73.57	60.1	292	45.4
[13898] GIRARD G. (2009)	YELLOWSTONE-SNAKE RIVER PLAIN VOLCANIC PROVINCE / YELLOWSTONE PLATEAU / YELLOWSTONE PLATEAU VOLCANIC FIELD	73.81	60.3	280	44.6
[13898] GIRARD G. (2009)	YELLOWSTONE-SNAKE RIVER PLAIN VOLCANIC PROVINCE / YELLOWSTONE PLATEAU / YELLOWSTONE PLATEAU VOLCANIC FIELD	72.46	56.1	280	42.3
[13898] GIRARD G. (2009)	YELLOWSTONE-SNAKE RIVER PLAIN VOLCANIC PROVINCE / YELLOWSTONE PLATEAU / YELLOWSTONE PLATEAU VOLCANIC FIELD	73.26	57.7	262	41.6
[13898] GIRARD G. (2009)	YELLOWSTONE-SNAKE RIVER PLAIN VOLCANIC PROVINCE / YELLOWSTONE PLATEAU / YELLOWSTONE PLATEAU VOLCANIC FIELD	74.18	61.7	389	46.9
[13898] GIRARD G. (2009)	YELLOWSTONE-SNAKE RIVER PLAIN VOLCANIC PROVINCE / YELLOWSTONE PLATEAU / YELLOWSTONE PLATEAU VOLCANIC FIELD	74.39	60.1	340	48.8
[13898] GIRARD G. (2009)	YELLOWSTONE-SNAKE RIVER PLAIN VOLCANIC PROVINCE / YELLOWSTONE PLATEAU / YELLOWSTONE PLATEAU VOLCANIC FIELD	76.74	52	205	33.4
[13898] GIRARD G. (2009)	YELLOWSTONE-SNAKE RIVER PLAIN VOLCANIC PROVINCE / YELLOWSTONE PLATEAU / YELLOWSTONE PLATEAU VOLCANIC FIELD	76.53	52.3	205	33.4
[16343] PRITCHARD R. G. (2012)	YELLOWSTONE-SNAKE RIVER PLAIN VOLCANIC PROVINCE / YELLOWSTONE PLATEAU / YELLOWSTONE PLATEAU VOLCANIC FIELD	76.1935	44.6	362.1	47.6
[16343] PRITCHARD R. G. (2012)	YELLOWSTONE-SNAKE RIVER PLAIN VOLCANIC PROVINCE / YELLOWSTONE PLATEAU / YELLOWSTONE PLATEAU VOLCANIC FIELD	76.1239	58	370.9	47.5
[16343] PRITCHARD R. G. (2012)	YELLOWSTONE-SNAKE RIVER PLAIN VOLCANIC PROVINCE / YELLOWSTONE PLATEAU / YELLOWSTONE PLATEAU VOLCANIC FIELD	76.3171	54.6	375.7	47.9
[16343] PRITCHARD R. G. (2012)	YELLOWSTONE-SNAKE RIVER PLAIN VOLCANIC PROVINCE / YELLOWSTONE PLATEAU / YELLOWSTONE PLATEAU VOLCANIC FIELD	76.0688	47.2	362.3	47.3
[16343] PRITCHARD R. G. (2012)	YELLOWSTONE-SNAKE RIVER PLAIN VOLCANIC PROVINCE / YELLOWSTONE PLATEAU / YELLOWSTONE PLATEAU VOLCANIC FIELD	75.968	50.7	370	48
CITATION	LOCATION	SIO2(WT%)	Y(PPM)	ZR(PPM)	NB(PPM)
[16343] PRITCHARD R. G. (2012)	YELLOWSTONE-SNAKE RIVER PLAIN VOLCANIC PROVINCE / YELLOWSTONE PLATEAU / YELLOWSTONE PLATEAU VOLCANIC FIELD	75.982	57.8	368.5	47.8
[16343] PRITCHARD R. G. (2012)	YELLOWSTONE-SNAKE RIVER PLAIN VOLCANIC PROVINCE / YELLOWSTONE PLATEAU / YELLOWSTONE PLATEAU VOLCANIC FIELD	76.0779	42.2	369.5	47.4
[16343] PRITCHARD R. G. (2012)	YELLOWSTONE-SNAKE RIVER PLAIN VOLCANIC PROVINCE / YELLOWSTONE PLATEAU / YELLOWSTONE PLATEAU VOLCANIC FIELD	76.0192	51.3	364.9	48.4
[16343] PRITCHARD R. G. (2012)	YELLOWSTONE-SNAKE RIVER PLAIN VOLCANIC PROVINCE / YELLOWSTONE PLATEAU / YELLOWSTONE PLATEAU VOLCANIC FIELD	77.9152	62	356.8	49.3
[16343] PRITCHARD R. G. (2012)	YELLOWSTONE-SNAKE RIVER PLAIN VOLCANIC PROVINCE / YELLOWSTONE PLATEAU / YELLOWSTONE PLATEAU VOLCANIC FIELD	76.7438	57.6	365.6	50.3
[16343] PRITCHARD R. G. (2012)	YELLOWSTONE-SNAKE RIVER PLAIN VOLCANIC PROVINCE / YELLOWSTONE PLATEAU / YELLOWSTONE PLATEAU VOLCANIC FIELD	77.3609	59.4	352.5	50.8
[16343] PRITCHARD R. G. (2012)	YELLOWSTONE-SNAKE RIVER PLAIN VOLCANIC PROVINCE / YELLOWSTONE PLATEAU / YELLOWSTONE PLATEAU VOLCANIC FIELD	76.8925	74.8	367.6	48.8
[16343] PRITCHARD R. G. (2012)	YELLOWSTONE-SNAKE RIVER PLAIN VOLCANIC PROVINCE / YELLOWSTONE PLATEAU / YELLOWSTONE PLATEAU VOLCANIC FIELD	76.5054	62	349.7	49.3
[16343] PRITCHARD R. G. (2012)	YELLOWSTONE-SNAKE RIVER PLAIN VOLCANIC PROVINCE / YELLOWSTONE PLATEAU / YELLOWSTONE PLATEAU VOLCANIC FIELD	77.2581	61.4	367.6	50.1
[16343] PRITCHARD R. G. (2012)	YELLOWSTONE-SNAKE RIVER PLAIN VOLCANIC PROVINCE / YELLOWSTONE PLATEAU / YELLOWSTONE PLATEAU VOLCANIC FIELD	77.255	71	388.4	50.9
[16343] PRITCHARD R. G. (2012)	YELLOWSTONE-SNAKE RIVER PLAIN VOLCANIC PROVINCE / YELLOWSTONE PLATEAU / YELLOWSTONE PLATEAU VOLCANIC FIELD	76.0295	62.5	375.4	49
[16343] PRITCHARD R. G. (2012)	YELLOWSTONE-SNAKE RIVER PLAIN VOLCANIC PROVINCE / YELLOWSTONE PLATEAU / YELLOWSTONE PLATEAU VOLCANIC FIELD	75.9712	46.6	379.1	48.5
[16343] PRITCHARD R. G. (2012)	YELLOWSTONE-SNAKE RIVER PLAIN VOLCANIC PROVINCE / YELLOWSTONE PLATEAU / YELLOWSTONE PLATEAU VOLCANIC FIELD	76.0077	55.5	400.6	47.9
[16343] PRITCHARD R. G. (2012)	YELLOWSTONE-SNAKE RIVER PLAIN VOLCANIC PROVINCE / YELLOWSTONE PLATEAU / YELLOWSTONE PLATEAU VOLCANIC FIELD	76.0292	58	384	48.3
[16343] PRITCHARD R. G. (2012)	YELLOWSTONE-SNAKE RIVER PLAIN VOLCANIC PROVINCE / YELLOWSTONE PLATEAU / YELLOWSTONE PLATEAU VOLCANIC FIELD	76.9	64.3	329	48.8
[16343] PRITCHARD R. G. (2012)	YELLOWSTONE-SNAKE RIVER PLAIN VOLCANIC PROVINCE / YELLOWSTONE PLATEAU / YELLOWSTONE PLATEAU VOLCANIC FIELD	76.5788	67.3	340	49.1
[16343] PRITCHARD R. G. (2012)	YELLOWSTONE-SNAKE RIVER PLAIN VOLCANIC PROVINCE / YELLOWSTONE PLATEAU / YELLOWSTONE PLATEAU VOLCANIC FIELD	76.9927	63.8	335.6	48.7
[16343] PRITCHARD R. G. (2012)	YELLOWSTONE-SNAKE RIVER PLAIN VOLCANIC PROVINCE / YELLOWSTONE PLATEAU / YELLOWSTONE PLATEAU VOLCANIC FIELD	75.1736	76.8	406.8	46.9
[16343] PRITCHARD R. G. (2012)	YELLOWSTONE-SNAKE RIVER PLAIN VOLCANIC PROVINCE / YELLOWSTONE PLATEAU / YELLOWSTONE PLATEAU VOLCANIC FIELD	77.2289	61	348.6	46.5
[16343] PRITCHARD R. G. (2012)	YELLOWSTONE-SNAKE RIVER PLAIN VOLCANIC PROVINCE / YELLOWSTONE PLATEAU / YELLOWSTONE PLATEAU VOLCANIC FIELD	77.1854	59.5	329.9	45.8
[16343] PRITCHARD R. G. (2012)	YELLOWSTONE-SNAKE RIVER PLAIN VOLCANIC PROVINCE / YELLOWSTONE PLATEAU / YELLOWSTONE PLATEAU VOLCANIC FIELD	83.1844	43.6	195.8	31.4
[16343] PRITCHARD R. G. (2012)	YELLOWSTONE-SNAKE RIVER PLAIN VOLCANIC PROVINCE / YELLOWSTONE PLATEAU / YELLOWSTONE PLATEAU VOLCANIC FIELD	76.9074	52.9	287.8	41.9
[16343] PRITCHARD R. G. (2012)	YELLOWSTONE-SNAKE RIVER PLAIN VOLCANIC PROVINCE / YELLOWSTONE PLATEAU / YELLOWSTONE PLATEAU VOLCANIC FIELD	76.9533	59.5	351	47.7
[16343] PRITCHARD R. G. (2012)	YELLOWSTONE-SNAKE RIVER PLAIN VOLCANIC PROVINCE / YELLOWSTONE PLATEAU / YELLOWSTONE PLATEAU VOLCANIC FIELD	76.4992	55.7	353.4	46
[16343] PRITCHARD R. G. (2012)	YELLOWSTONE-SNAKE RIVER PLAIN VOLCANIC PROVINCE / YELLOWSTONE PLATEAU / YELLOWSTONE PLATEAU VOLCANIC FIELD	76.2393	54.4	404.7	46.5
[16343] PRITCHARD R. G. (2012)	YELLOWSTONE-SNAKE RIVER PLAIN VOLCANIC PROVINCE / YELLOWSTONE PLATEAU / YELLOWSTONE PLATEAU VOLCANIC FIELD	77.2893	50.3	363.5	50.7
[16343] PRITCHARD R. G. (2012)	YELLOWSTONE-SNAKE RIVER PLAIN VOLCANIC PROVINCE / YELLOWSTONE PLATEAU / YELLOWSTONE PLATEAU VOLCANIC FIELD	75.5863	52	432.1	45.7
[16343] PRITCHARD R. G. (2012)	YELLOWSTONE-SNAKE RIVER PLAIN VOLCANIC PROVINCE / YELLOWSTONE PLATEAU / YELLOWSTONE PLATEAU VOLCANIC FIELD	75.8892	60.4	393.5	49.6
[16343] PRITCHARD R. G. (2012)	YELLOWSTONE-SNAKE RIVER PLAIN VOLCANIC PROVINCE / YELLOWSTONE PLATEAU / YELLOWSTONE PLATEAU VOLCANIC FIELD	89.2465	31.1	175.1	23.4
[16343] PRITCHARD R. G. (2012)	YELLOWSTONE-SNAKE RIVER PLAIN VOLCANIC PROVINCE / YELLOWSTONE PLATEAU / YELLOWSTONE PLATEAU VOLCANIC FIELD	88.6509	34.5	192.5	25.1
[16343] PRITCHARD R. G. (2012)	YELLOWSTONE-SNAKE RIVER PLAIN VOLCANIC PROVINCE / YELLOWSTONE PLATEAU / YELLOWSTONE PLATEAU VOLCANIC FIELD	82.5626	47.4	251.3	35.2
[16343] PRITCHARD R. G. (2012)	YELLOWSTONE-SNAKE RIVER PLAIN VOLCANIC PROVINCE / YELLOWSTONE PLATEAU / YELLOWSTONE PLATEAU VOLCANIC FIELD	84.2945	45.9	174.6	30.5
[16343] PRITCHARD R. G. (2012)	YELLOWSTONE-SNAKE RIVER PLAIN VOLCANIC PROVINCE / YELLOWSTONE PLATEAU / YELLOWSTONE PLATEAU VOLCANIC FIELD	89.5643	30.6	116.1	21.9
[16343] PRITCHARD R. G. (2012)	YELLOWSTONE-SNAKE RIVER PLAIN VOLCANIC PROVINCE / YELLOWSTONE PLATEAU / YELLOWSTONE PLATEAU VOLCANIC FIELD	77.4393	60.9	332.8	47.8
[16343] PRITCHARD R. G. (2012)	YELLOWSTONE-SNAKE RIVER PLAIN VOLCANIC PROVINCE / YELLOWSTONE PLATEAU / YELLOWSTONE PLATEAU VOLCANIC FIELD	77.6472	51.5	188.9	33
[16343] PRITCHARD R. G. (2012)	YELLOWSTONE-SNAKE RIVER PLAIN VOLCANIC PROVINCE / YELLOWSTONE PLATEAU / YELLOWSTONE PLATEAU VOLCANIC FIELD	75.9819	53.6	371.6	48
[16343] PRITCHARD R. G. (2012)	YELLOWSTONE-SNAKE RIVER PLAIN VOLCANIC PROVINCE / YELLOWSTONE PLATEAU / YELLOWSTONE PLATEAU VOLCANIC FIELD	75.844	60.5	387.7	48
[16343] PRITCHARD R. G. (2012)	YELLOWSTONE-SNAKE RIVER PLAIN VOLCANIC PROVINCE / YELLOWSTONE PLATEAU / YELLOWSTONE PLATEAU VOLCANIC FIELD	75.9298	54	369	48.3
[16343] PRITCHARD R. G. (2012)	YELLOWSTONE-SNAKE RIVER PLAIN VOLCANIC PROVINCE / YELLOWSTONE PLATEAU / YELLOWSTONE PLATEAU VOLCANIC FIELD	75.7898	61.8	386.9	49.9
[16343] PRITCHARD R. G. (2012)	YELLOWSTONE-SNAKE RIVER PLAIN VOLCANIC PROVINCE / YELLOWSTONE PLATEAU / YELLOWSTONE PLATEAU VOLCANIC FIELD	77.118	57.5	270.6	41.9
[16343] PRITCHARD R. G. (2012)	YELLOWSTONE-SNAKE RIVER PLAIN VOLCANIC PROVINCE / YELLOWSTONE PLATEAU / YELLOWSTONE PLATEAU VOLCANIC FIELD	77.0379	42	290.9	46.1
[16343] PRITCHARD R. G. (2012)	YELLOWSTONE-SNAKE RIVER PLAIN VOLCANIC PROVINCE / YELLOWSTONE PLATEAU / YELLOWSTONE PLATEAU VOLCANIC FIELD	77.1062	52.2	239.3	38.9
[16343] PRITCHARD R. G. (2012)	YELLOWSTONE-SNAKE RIVER PLAIN VOLCANIC PROVINCE / YELLOWSTONE PLATEAU / YELLOWSTONE PLATEAU VOLCANIC FIELD	76.9177	46.3	273.2	42.6
[16343] PRITCHARD R. G. (2012)	YELLOWSTONE-SNAKE RIVER PLAIN VOLCANIC PROVINCE / YELLOWSTONE PLATEAU / YELLOWSTONE PLATEAU VOLCANIC FIELD	77.2512	54	237.2	40.6
[16343] PRITCHARD R. G. (2012)	YELLOWSTONE-SNAKE RIVER PLAIN VOLCANIC PROVINCE / YELLOWSTONE PLATEAU / YELLOWSTONE PLATEAU VOLCANIC FIELD	75.9922	59.9	330.4	44.2
[16343] PRITCHARD R. G. (2012)	YELLOWSTONE-SNAKE RIVER PLAIN VOLCANIC PROVINCE / YELLOWSTONE PLATEAU / YELLOWSTONE PLATEAU VOLCANIC FIELD	76.2902	58.5	382.2	49.7
[16343] PRITCHARD R. G. (2012)	YELLOWSTONE-SNAKE RIVER PLAIN VOLCANIC PROVINCE / YELLOWSTONE PLATEAU / YELLOWSTONE PLATEAU VOLCANIC FIELD	76.5542	65.3	369.4	47.9
[16343] PRITCHARD R. G. (2012)	YELLOWSTONE-SNAKE RIVER PLAIN VOLCANIC PROVINCE / YELLOWSTONE PLATEAU / YELLOWSTONE PLATEAU VOLCANIC FIELD	76.2766	58.6	357.9	48.5
[16343] PRITCHARD R. G. (2012)	YELLOWSTONE-SNAKE RIVER PLAIN VOLCANIC PROVINCE / YELLOWSTONE PLATEAU / YELLOWSTONE PLATEAU VOLCANIC FIELD	75.9185	56.5	366.8	48.7
[16343] PRITCHARD R. G. (2012)	YELLOWSTONE-SNAKE RIVER PLAIN VOLCANIC PROVINCE / YELLOWSTONE PLATEAU / YELLOWSTONE PLATEAU VOLCANIC FIELD	76.1831	61.6	375.7	49.3
[16343] PRITCHARD R. G. (2012)	YELLOWSTONE-SNAKE RIVER PLAIN VOLCANIC PROVINCE / YELLOWSTONE PLATEAU / YELLOWSTONE PLATEAU VOLCANIC FIELD	75.754	62.9	378.1	48.3
[16343] PRITCHARD R. G. (2012)	YELLOWSTONE-SNAKE RIVER PLAIN VOLCANIC PROVINCE / YELLOWSTONE PLATEAU / YELLOWSTONE PLATEAU VOLCANIC FIELD	76.6294	57.8	285.8	42.1
[16343] PRITCHARD R. G. (2012)	YELLOWSTONE-SNAKE RIVER PLAIN VOLCANIC PROVINCE / YELLOWSTONE PLATEAU / YELLOWSTONE PLATEAU VOLCANIC FIELD	75.9915	68.3	379.6	48.4
[16343] PRITCHARD R. G. (2012)	YELLOWSTONE-SNAKE RIVER PLAIN VOLCANIC PROVINCE / YELLOWSTONE PLATEAU / YELLOWSTONE PLATEAU VOLCANIC FIELD	76.0668	57	384.6	47.8
[16343] PRITCHARD R. G. (2012)	YELLOWSTONE-SNAKE RIVER PLAIN VOLCANIC PROVINCE / YELLOWSTONE PLATEAU / YELLOWSTONE PLATEAU VOLCANIC FIELD	75.7382	59.2	378.4	46.7
[16343] PRITCHARD R. G. (2012)	YELLOWSTONE-SNAKE RIVER PLAIN VOLCANIC PROVINCE / YELLOWSTONE PLATEAU / YELLOWSTONE PLATEAU VOLCANIC FIELD	75.4038	74.3	404.1	46.6
[16343] PRITCHARD R. G. (2012)	YELLOWSTONE-SNAKE RIVER PLAIN VOLCANIC PROVINCE / YELLOWSTONE PLATEAU / YELLOWSTONE PLATEAU VOLCANIC FIELD	76.2271	63.7	372.9	47.2
[16343] PRITCHARD R. G. (2012)	YELLOWSTONE-SNAKE RIVER PLAIN VOLCANIC PROVINCE / YELLOWSTONE PLATEAU / YELLOWSTONE PLATEAU VOLCANIC FIELD	76.1487	166.2	369.8	49
CITATION	LOCATION	SIO2(WT%)	Y(PPM)	ZR(PPM)	NB(PPM)
[16343] PRITCHARD R. G. (2012)	YELLOWSTONE-SNAKE RIVER PLAIN VOLCANIC PROVINCE / YELLOWSTONE PLATEAU / YELLOWSTONE PLATEAU VOLCANIC FIELD	75.9575	63.9	366.9	48
[16343] PRITCHARD R. G. (2012)	YELLOWSTONE-SNAKE RIVER PLAIN VOLCANIC PROVINCE / YELLOWSTONE PLATEAU / YELLOWSTONE PLATEAU VOLCANIC FIELD	76.1733	59.7	381.3	49.2
[16343] PRITCHARD R. G. (2012)	YELLOWSTONE-SNAKE RIVER PLAIN VOLCANIC PROVINCE / YELLOWSTONE PLATEAU / YELLOWSTONE PLATEAU VOLCANIC FIELD	76.4309	64.8	326.4	46.4
[16343] PRITCHARD R. G. (2012)	YELLOWSTONE-SNAKE RIVER PLAIN VOLCANIC PROVINCE / YELLOWSTONE PLATEAU / YELLOWSTONE PLATEAU VOLCANIC FIELD	74.7518	62.3	431	45.3
[16343] PRITCHARD R. G. (2012)	YELLOWSTONE-SNAKE RIVER PLAIN VOLCANIC PROVINCE / YELLOWSTONE PLATEAU / YELLOWSTONE PLATEAU VOLCANIC FIELD	74.5726	61.1	409.9	43.7
[16343] PRITCHARD R. G. (2012)	YELLOWSTONE-SNAKE RIVER PLAIN VOLCANIC PROVINCE / YELLOWSTONE PLATEAU / YELLOWSTONE PLATEAU VOLCANIC FIELD	75.0062	62.2	377.3	46.2
[16343] PRITCHARD R. G. (2012)	YELLOWSTONE-SNAKE RIVER PLAIN VOLCANIC PROVINCE / YELLOWSTONE PLATEAU / YELLOWSTONE PLATEAU VOLCANIC FIELD	80.0554	54.8	328	41.7
[16343] PRITCHARD R. G. (2012)	YELLOWSTONE-SNAKE RIVER PLAIN VOLCANIC PROVINCE / YELLOWSTONE PLATEAU / YELLOWSTONE PLATEAU VOLCANIC FIELD	77.9014	59.1	345.5	46.1
[16343] PRITCHARD R. G. (2012)	YELLOWSTONE-SNAKE RIVER PLAIN VOLCANIC PROVINCE / YELLOWSTONE PLATEAU / YELLOWSTONE PLATEAU VOLCANIC FIELD	77.0851	62.7	348.8	48.1
[16343] PRITCHARD R. G. (2012)	YELLOWSTONE-SNAKE RIVER PLAIN VOLCANIC PROVINCE / YELLOWSTONE PLATEAU / YELLOWSTONE PLATEAU VOLCANIC FIELD	75.6224	65.2	398.2	47
[16343] PRITCHARD R. G. (2012)	YELLOWSTONE-SNAKE RIVER PLAIN VOLCANIC PROVINCE / YELLOWSTONE PLATEAU / YELLOWSTONE PLATEAU VOLCANIC FIELD	73.975	45.2	441.1	41.9
[16343] PRITCHARD R. G. (2012)	YELLOWSTONE-SNAKE RIVER PLAIN VOLCANIC PROVINCE / YELLOWSTONE PLATEAU / YELLOWSTONE PLATEAU VOLCANIC FIELD	77.4644	54.3	196.2	35.4
[16343] PRITCHARD R. G. (2012)	YELLOWSTONE-SNAKE RIVER PLAIN VOLCANIC PROVINCE / YELLOWSTONE PLATEAU / YELLOWSTONE PLATEAU VOLCANIC FIELD	77.5922	48	187.4	33.9
[16343] PRITCHARD R. G. (2012)	YELLOWSTONE-SNAKE RIVER PLAIN VOLCANIC PROVINCE / YELLOWSTONE PLATEAU / YELLOWSTONE PLATEAU VOLCANIC FIELD	77.3388	52	186.4	33.3
[16343] PRITCHARD R. G. (2012)	YELLOWSTONE-SNAKE RIVER PLAIN VOLCANIC PROVINCE / YELLOWSTONE PLATEAU / YELLOWSTONE PLATEAU VOLCANIC FIELD	77.5357	42.8	191.6	34.4
[16343] PRITCHARD R. G. (2012)	YELLOWSTONE-SNAKE RIVER PLAIN VOLCANIC PROVINCE / YELLOWSTONE PLATEAU / YELLOWSTONE PLATEAU VOLCANIC FIELD	77.5344	51.9	186.8	33.1
[16343] PRITCHARD R. G. (2012)	YELLOWSTONE-SNAKE RIVER PLAIN VOLCANIC PROVINCE / YELLOWSTONE PLATEAU / YELLOWSTONE PLATEAU VOLCANIC FIELD	76.87	47.9	212.3	36.1
[16343] PRITCHARD R. G. (2012)	YELLOWSTONE-SNAKE RIVER PLAIN VOLCANIC PROVINCE / YELLOWSTONE PLATEAU / YELLOWSTONE PLATEAU VOLCANIC FIELD	77.4403	52.5	187.1	33.3
[16343] PRITCHARD R. G. (2012)	YELLOWSTONE-SNAKE RIVER PLAIN VOLCANIC PROVINCE / YELLOWSTONE PLATEAU / YELLOWSTONE PLATEAU VOLCANIC FIELD	77.24	52.7	194.2	33
[16343] PRITCHARD R. G. (2012)	YELLOWSTONE-SNAKE RIVER PLAIN VOLCANIC PROVINCE / YELLOWSTONE PLATEAU / YELLOWSTONE PLATEAU VOLCANIC FIELD	77.5044	53.2	190.6	34.1
[16343] PRITCHARD R. G. (2012)	YELLOWSTONE-SNAKE RIVER PLAIN VOLCANIC PROVINCE / YELLOWSTONE PLATEAU / YELLOWSTONE PLATEAU VOLCANIC FIELD	77.6212	45.4	188.2	33.8
[16343] PRITCHARD R. G. (2012)	YELLOWSTONE-SNAKE RIVER PLAIN VOLCANIC PROVINCE / YELLOWSTONE PLATEAU / YELLOWSTONE PLATEAU VOLCANIC FIELD	77.737	47	188.4	34.7
[16343] PRITCHARD R. G. (2012)	YELLOWSTONE-SNAKE RIVER PLAIN VOLCANIC PROVINCE / YELLOWSTONE PLATEAU / YELLOWSTONE PLATEAU VOLCANIC FIELD	77.5168	46.7	189.8	33.7
[16343] PRITCHARD R. G. (2012)	YELLOWSTONE-SNAKE RIVER PLAIN VOLCANIC PROVINCE / YELLOWSTONE PLATEAU / YELLOWSTONE PLATEAU VOLCANIC FIELD	77.5685	28.2	190	33.3
